# Supplementary material for: Ferrocene modified analogues of imatinib and nilotinib as potent anti-cancer agents
Source: Royal Society of Chemistry journal article supplement (doi:10.1039/d3md00030c), 2023-01-01
Supplement: d3md00030c1.pdf [file d3md00030c1.pdf]

## Supplementary Information

### Ferrocene modified analogues of imatinib and nilotinib as potent anti-cancer agents

Irena Philipova,<sup>a</sup> Rositsa Mihaylova,<sup>b</sup> Georgi Momekov,<sup>b</sup> Rostislava Angelova<sup>b</sup> and Georgi Stavrakov<sup>\*ab</sup>

---

<sup>a</sup> *Institute of Organic Chemistry with Centre of Phytochemistry, Bulgarian Academy of Sciences, Acad. G. Bontchev str. Bl. 9, 1113 Sofia, Bulgaria.*

<sup>b</sup> *Faculty of Pharmacy, Medical University – Sofia, Dunav str. 2, Sofia 1000, Bulgaria.*

**Copies of <sup>1</sup>H and <sup>13</sup>C NMR spectra of the target compounds.**

**<sup>1</sup>H NMR monitoring of 15a stability in DMSO-*d*<sub>6</sub> (80%) / PBS in D<sub>2</sub>O (20%)**

# Compound 3

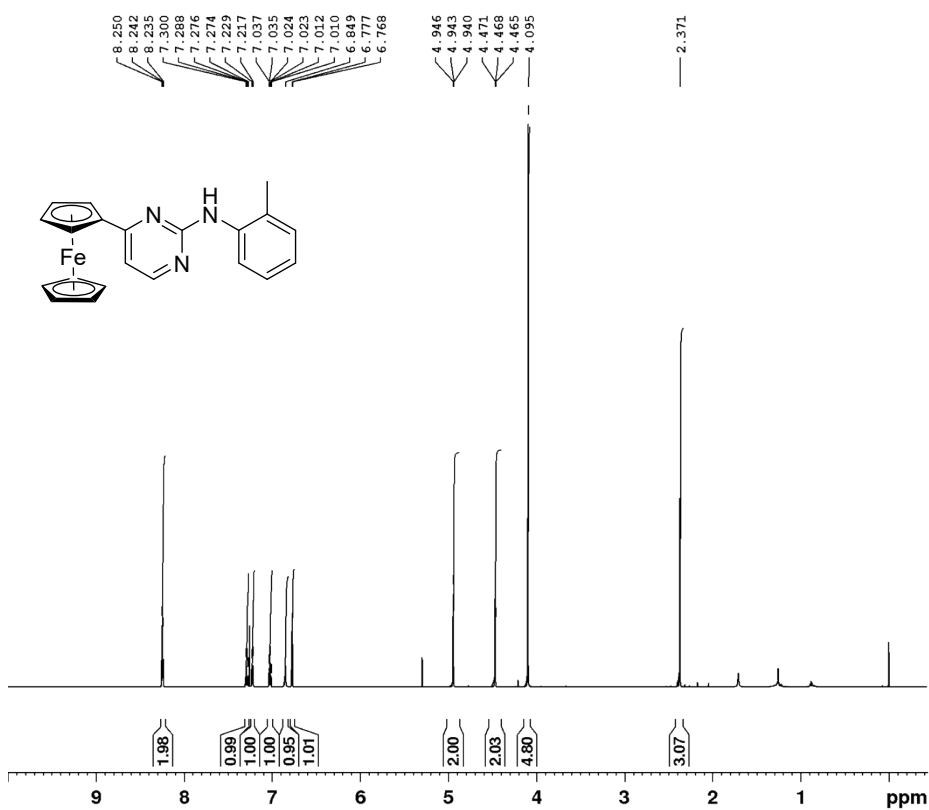

```

Current Data Parameters
NAME          FL07603
EXPNO         11
PROCNO        1

F2 - Acquisition Parameters
Date_         20220318
Time          4.33 h
INSTRUM       spect
PROBHD        Z847801_0047 (
PULPROG       zg30
TD            65536
SOLVENT       CDCl3
NS            16
DS            0
SWH           9615.385 Hz
FIDRES        0.293438 Hz
AQ            3.4078720 sec
RG            203
DW            52.000 usec
DE            14.38 usec
TE            293.0 K
D1            2.00000000 sec
TD0           1
SF01          599.9845606 MHz
NUC1          1H
P0            3.60 usec
P1            10.80 usec
PLW1          20.00000000 W

F2 - Processing parameters
SI            65536
SF            599.9800169 MHz
WDW           EM
SSB           0
LB            0 Hz
GB            0
PC            1.00
    
```

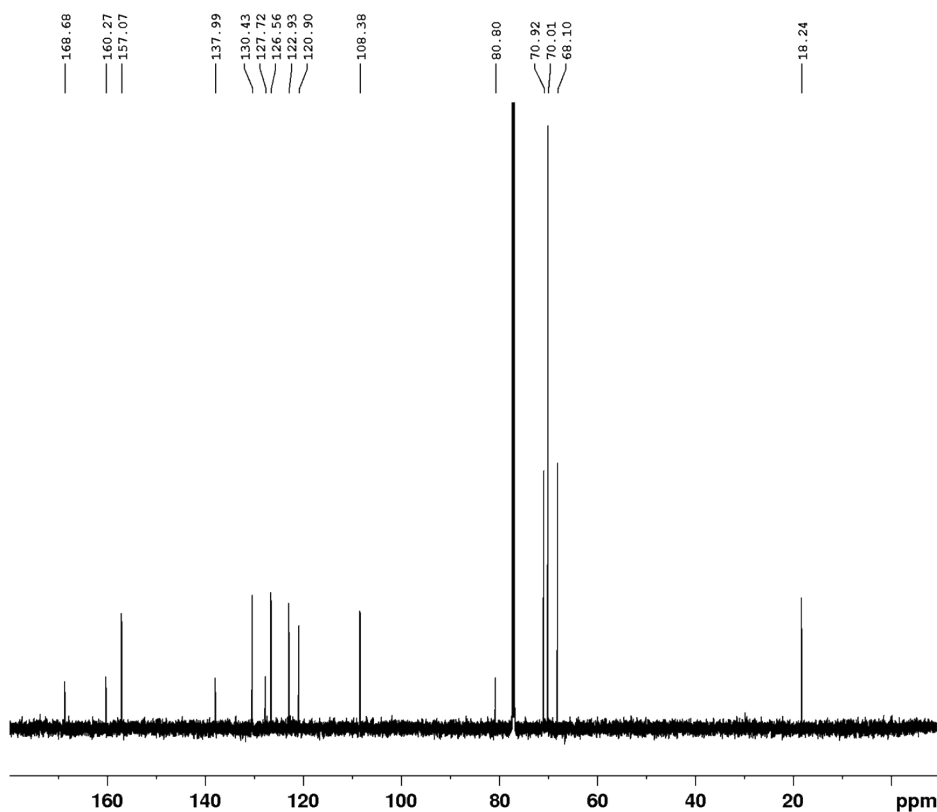

```

Current Data Parameters
NAME          FL07603
EXPNO         12
PROCNO        1

F2 - Acquisition Parameters
Date_         20220318
Time          4.38 h
INSTRUM       spect
PROBHD        Z847801_0047 (
PULPROG       zgdc30
TD            32768
SOLVENT       CDCl3
NS            128
DS            0
SWH           36057.691 Hz
FIDRES        2.200787 Hz
AQ            0.4543829 sec
RG            2050
DW            13.867 usec
DE            6.50 usec
TE            293.1 K
D1            1.50000000 sec
D11           0.03000000 sec
TD0           1
SF01          150.8816889 MHz
NUC1          13C
P0            3.27 usec
P1            9.80 usec
PLW1          40.00000000 W
SF02          599.9824003 MHz
NUC2          1H
CPDPRG[2]     waltz16
PCPD2         70.00 usec
PLW2          20.00000000 W
PLW12         0.53044999 W

F2 - Processing parameters
SI            65536
SF            150.8650910 MHz
WDW           EM
SSB           0
LB            1.00 Hz
GB            0
PC            1.40
    
```

# Compound 9

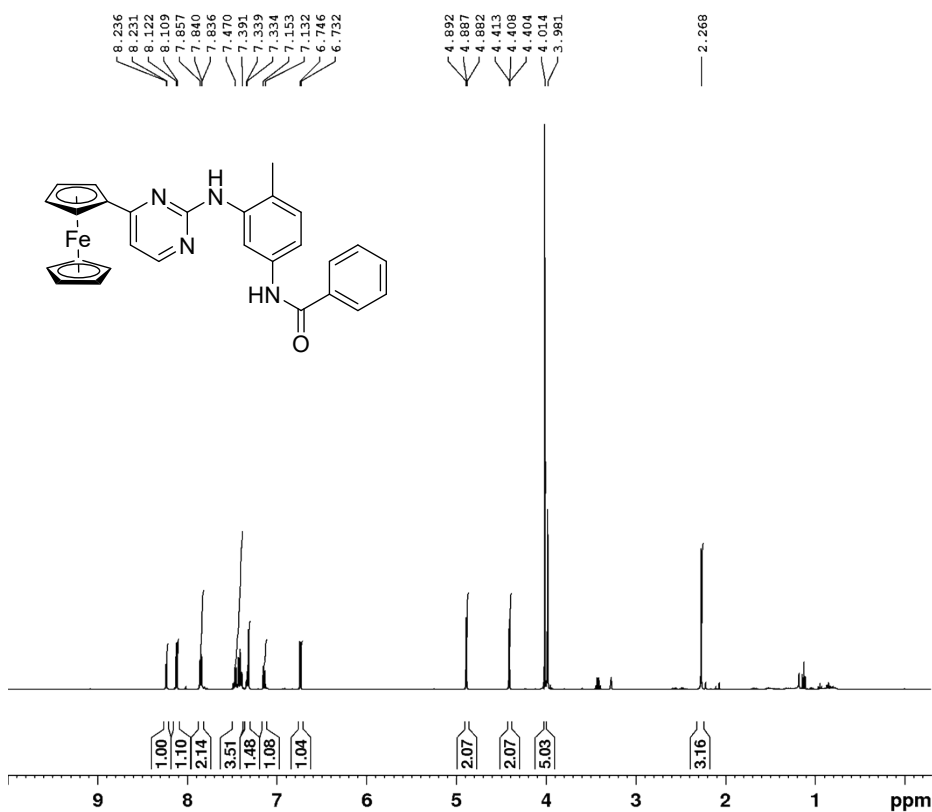

**Current Data Parameters**

NAME FL09402  
 EXPNO 17  
 PROCNO 1

**F2 - Acquisition Parameters**

Date\_ 20220517  
 Time 14.01 h  
 INSTRUM Avance Neo 400  
 PROBHD Z175272.0007 (  
 PULPROG zg30  
 TD 65536  
 SOLVENT MeOD  
 NS 32  
 DS 0  
 SWH 6578.947 Hz  
 FIDRES 0.200774 Hz  
 AQ 4.9807358 sec  
 RG 101  
 DW 76.000 usec  
 DE 7.79 usec  
 TE 298.0 K  
 D1 2.00000000 sec  
 TD0 1  
 SFO1 400.1330415 MHz  
 NUC1 1H  
 P0 3.33 usec  
 P1 10.00 usec  
 PLW1 20.07200050 W

**F2 - Processing parameters**

SI 65536  
 SF 400.1300230 MHz  
 WDW EM  
 SSB 0  
 LB 0 Hz  
 GB 0  
 PC 1.00

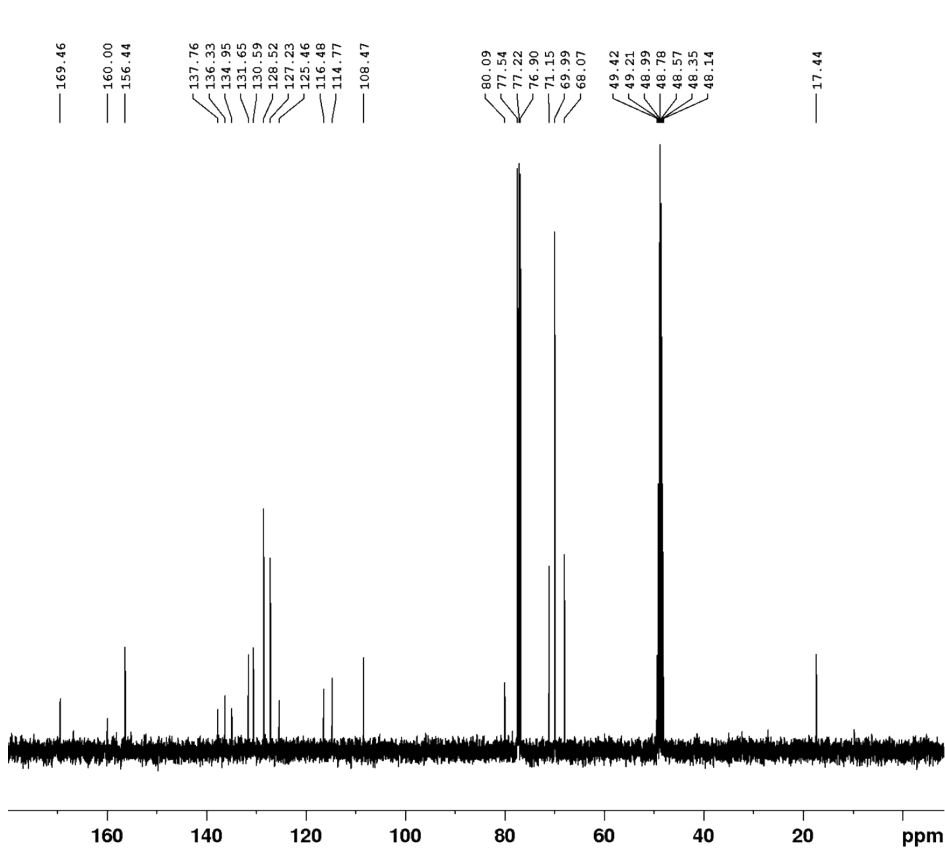

**Current Data Parameters**

NAME FL09402  
 EXPNO 18  
 PROCNO 1

**F2 - Acquisition Parameters**

Date\_ 20220517  
 Time 14.06 h  
 INSTRUM Avance Neo 400  
 PROBHD Z175272.0007 (  
 PULPROG zgdc30  
 TD 32768  
 SOLVENT MeOD  
 NS 128  
 DS 0  
 SWH 23809.523 Hz  
 FIDRES 1.453218 Hz  
 AQ 0.6881280 sec  
 RG 32  
 DW 21.000 usec  
 DE 6.50 usec  
 TE 298.0 K  
 D1 1.50000000 sec  
 D11 0.03000000 sec  
 TD0 1  
 SFO1 100.6238383 MHz  
 NUC1 13C  
 P0 3.33 usec  
 P1 10.00 usec  
 PLW1 58.46900177 W  
 SFO2 400.1316008 MHz  
 NUC2 1H  
 CPDPRG2 waltz16  
 FCPD2 90.00 usec  
 PLW2 20.07200050 W  
 PLW12 0.24781001 W

**F2 - Processing parameters**

SI 65536  
 SF 100.6127690 MHz  
 WDW EM  
 SSB 0  
 LB 1.00 Hz  
 GB 0  
 PC 1.40

# Compound 15a

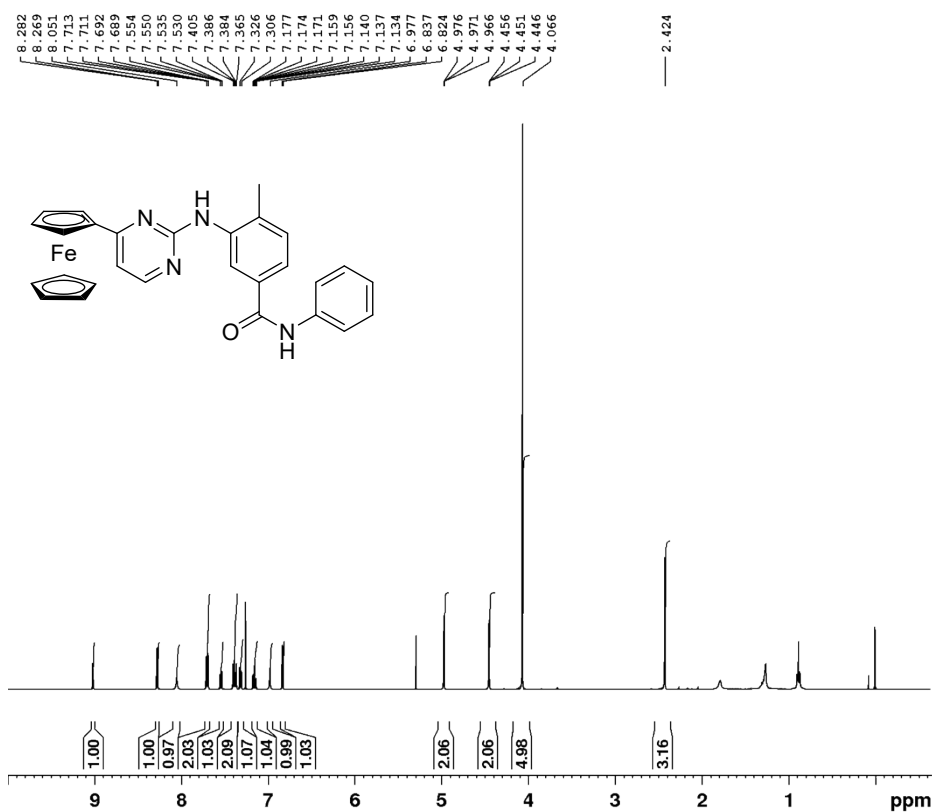

Current Data Parameters  
 NAME FL08402  
 EXPNO 11  
 PROCNO 1

F2 - Acquisition Parameters  
 Date\_ 20220411  
 Time 17.57 h  
 INSTRUM Avance Neo 400  
 PROBHD z175272.0007 ( )  
 PULPROG zg30  
 TD 32768  
 SOLVENT CDCl3  
 NS 32  
 DS 0  
 SWH 6578.947 Hz  
 FIDRES 0.401547 Hz  
 AQ 2.4903679 sec  
 RG 101  
 DW 76.000 usec  
 DE 7.79 usec  
 TE 298.0 K  
 D1 2.00000000 sec  
 TD0 1  
 SFO1 400.1330415 MHz  
 NUC1 1H  
 P0 3.33 usec  
 P1 10.00 usec  
 PLW1 20.07200050 W

F2 - Processing parameters  
 SI 65536  
 SF 400.1300102 MHz  
 WDW EM  
 SSB 0  
 LB 0 Hz  
 GB 0  
 PC 1.00

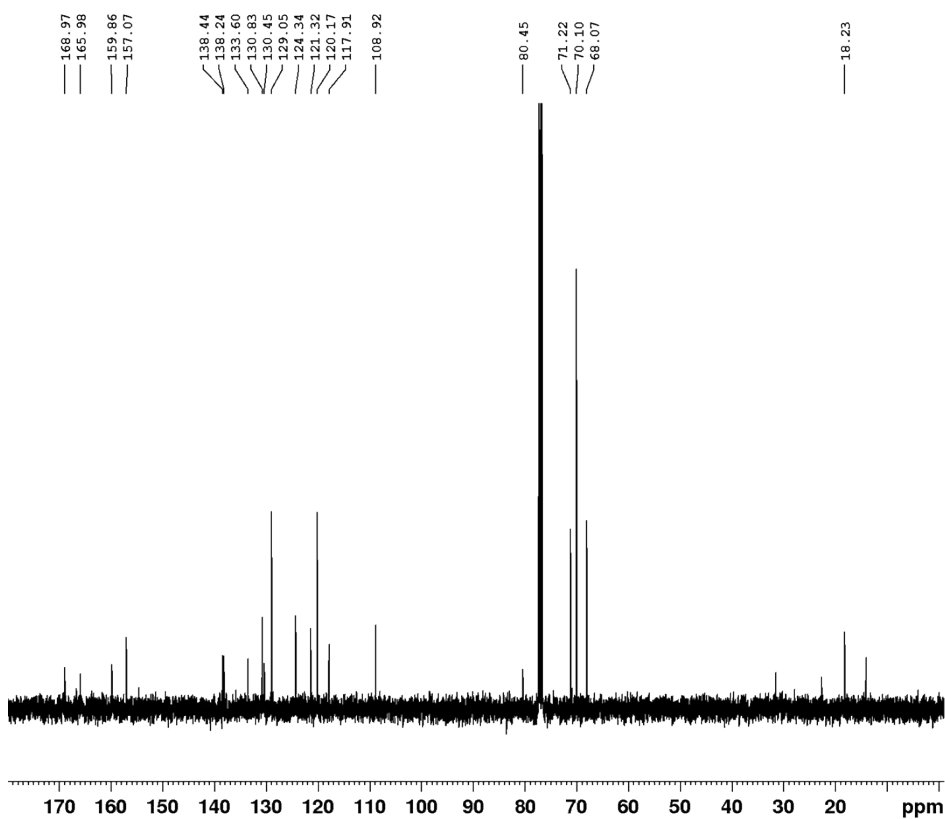

Current Data Parameters  
 NAME FL08402  
 EXPNO 12  
 PROCNO 1

F2 - Acquisition Parameters  
 Date\_ 20220411  
 Time 18.02 h  
 INSTRUM Avance Neo 400  
 PROBHD z175272.0007 ( )  
 PULPROG zgdc30  
 TD 32768  
 SOLVENT CDCl3  
 NS 128  
 DS 0  
 SWH 23809.523 Hz  
 FIDRES 1.453218 Hz  
 AQ 0.6881280 sec  
 RG 22.6  
 DW 21.000 usec  
 DE 6.50 usec  
 TE 298.0 K  
 D1 1.50000000 sec  
 D11 0.03000000 sec  
 TD0 1  
 SFO1 100.6238383 MHz  
 NUC1 13C  
 P0 3.33 usec  
 P1 10.00 usec  
 PLW1 58.46900177 W  
 SFO2 400.1316008 MHz  
 NUC2 1H  
 CPDPRG2 waltz16  
 FCPD2 90.00 usec  
 PLW2 20.07200050 W  
 PLW12 0.24781001 W

F2 - Processing parameters  
 SI 65536  
 SF 100.6127690 MHz  
 WDW EM  
 SSB 0  
 LB 1.00 Hz  
 GB 0  
 PC 1.40

# Compound 15b

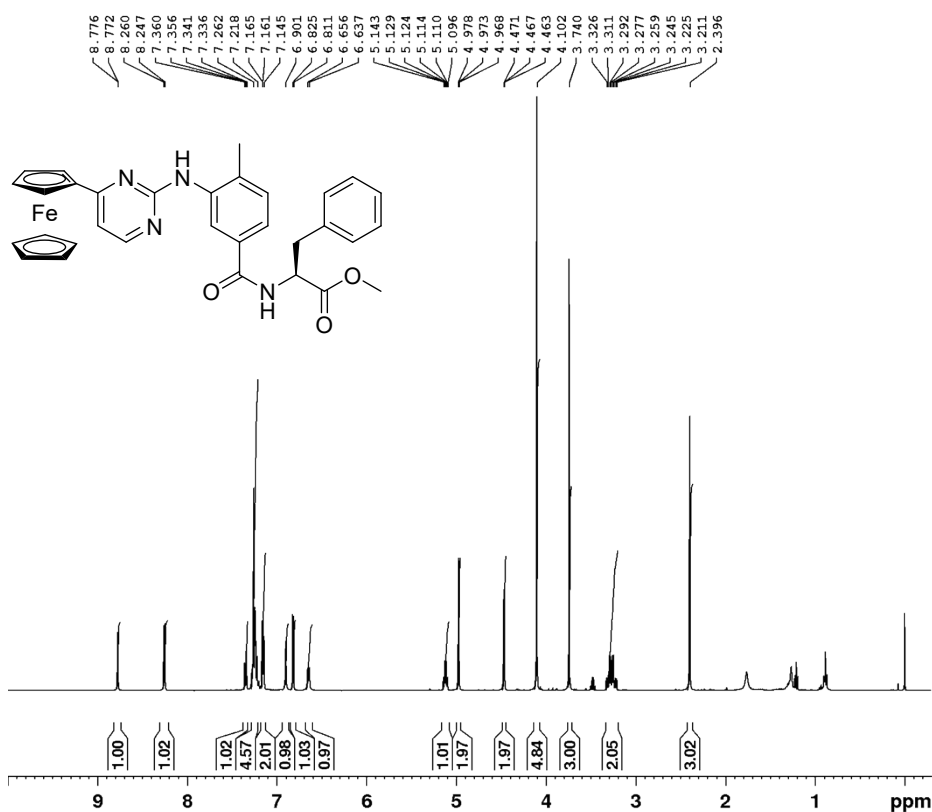

Current Data Parameters  
 NAME FL08802  
 EXPNO 11  
 PROCNO 1

F2 - Acquisition Parameters  
 Date\_ 20220418  
 Time 16.56 h  
 INSTRUM Avance Neo 400  
 PROBHD z175272\_0007 ( )  
 PULPROG zg30  
 TD 32768  
 SOLVENT CDCl3  
 NS 32  
 DS 0  
 SWH 6578.947 Hz  
 FIDRES 0.401547 Hz  
 AQ 2.4903679 sec  
 RG 101  
 DW 76.000 usec  
 DE 7.79 usec  
 TE 298.0 K  
 D1 2.00000000 sec  
 TD0 1  
 SFO1 400.1330415 MHz  
 NUC1 1H  
 P0 3.33 usec  
 P1 10.00 usec  
 PLW1 20.07200050 W

F2 - Processing parameters  
 SI 65536  
 SF 400.1300103 MHz  
 WDW EM  
 SSB 0  
 LB 0 Hz  
 GB 0  
 PC 1.00

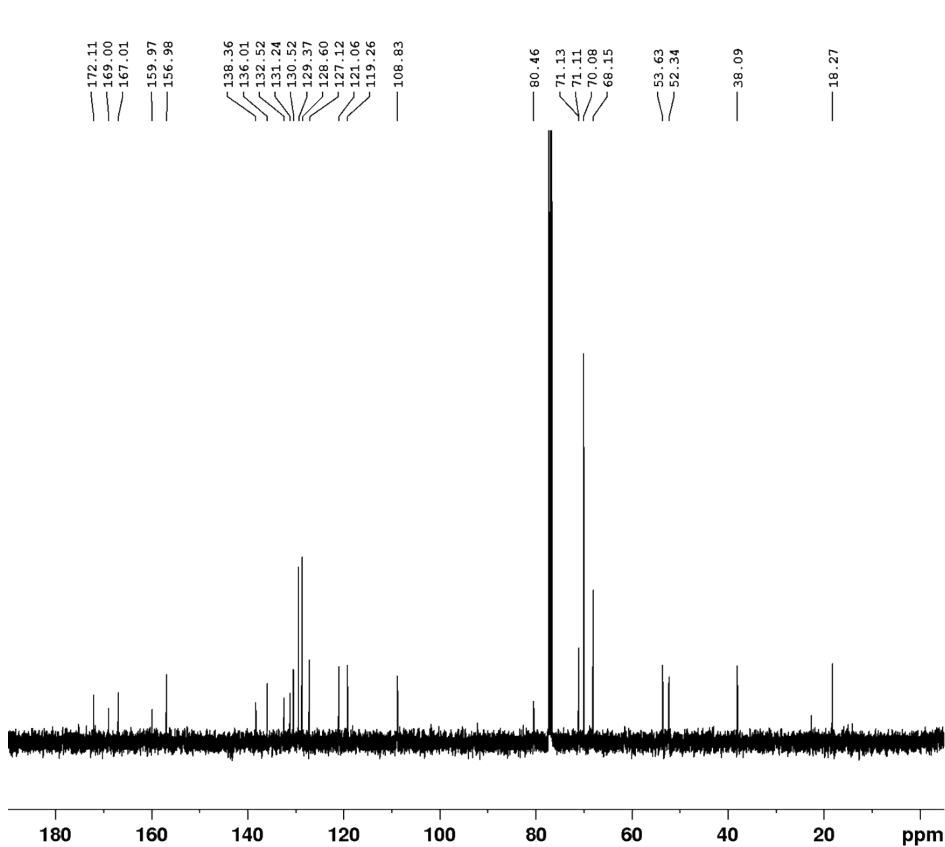

Current Data Parameters  
 NAME FL08802  
 EXPNO 12  
 PROCNO 1

F2 - Acquisition Parameters  
 Date\_ 20220418  
 Time 17.02 h  
 INSTRUM Avance Neo 400  
 PROBHD z175272\_0007 ( )  
 PULPROG zgdc30  
 TD 32768  
 SOLVENT CDCl3  
 NS 128  
 DS 0  
 SWH 23809.523 Hz  
 FIDRES 1.453218 Hz  
 AQ 0.6881280 sec  
 RG 22.6  
 DW 21.000 usec  
 DE 6.50 usec  
 TE 298.0 K  
 D1 1.50000000 sec  
 D11 0.03000000 sec  
 TD0 1  
 SFO1 100.6238383 MHz  
 NUC1 13C  
 P0 3.33 usec  
 P1 10.00 usec  
 PLW1 58.46900177 W  
 SFO2 400.1316008 MHz  
 NUC2 1H  
 CPDPRG[2] waltz16  
 PCPD2 90.00 usec  
 PLW2 20.07200050 W  
 PLW12 0.24781001 W

F2 - Processing parameters  
 SI 65536  
 SF 100.6127690 MHz  
 WDW EM  
 SSB 0  
 LB 1.00 Hz  
 GB 0  
 PC 1.40

# Compound 15c

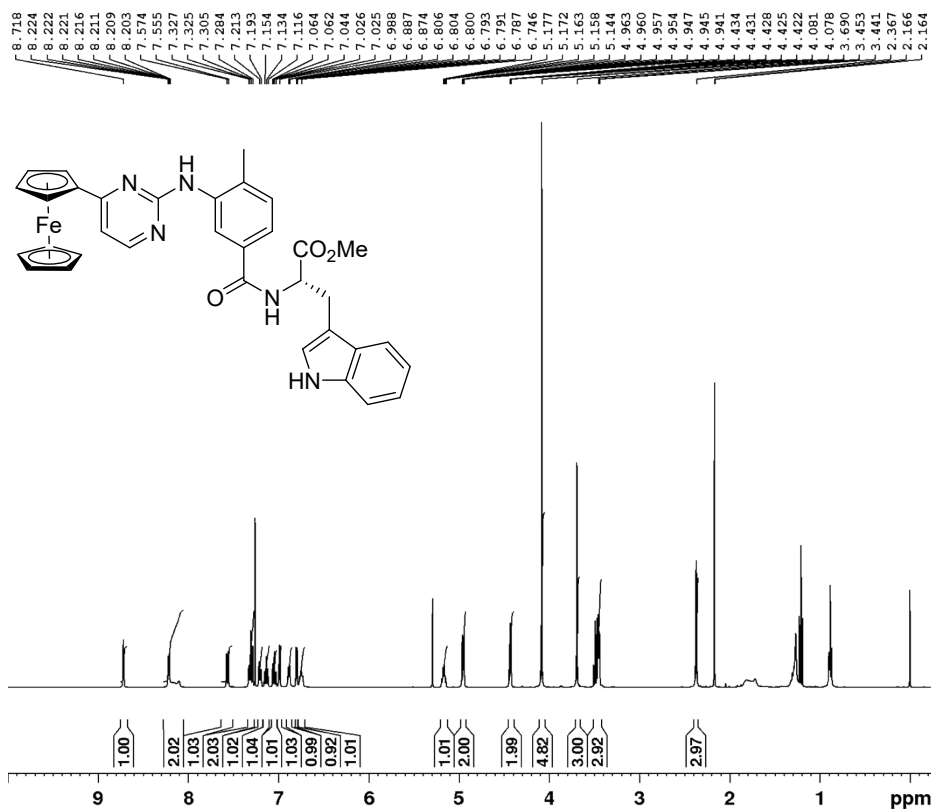

Current Data Parameters

NAME FL08902  
EXPNO 11  
PROCNO 1

F2 - Acquisition Parameters

Date\_ 20220419  
Time 16.40 h  
INSTRUM Avance Neo 400  
PROBHD Z175272\_0007 (  
PULPROG zg30  
TD 32768  
SOLVENT CDCl3  
NS 32  
DS 0  
SWH 6578.947 Hz  
FIDRES 0.401547 Hz  
AQ 2.4903679 sec  
RG 101  
DW 76.000 usec  
DE 7.79 usec  
TE 298.0 K  
D1 2.00000000 sec  
TDO 1  
SFO1 400.1330415 MHz  
NUC1 1H  
PO 3.33 usec  
P1 10.00 usec  
PLW1 20.07200050 W

F2 - Processing parameters

SI 65536  
SF 400.1300107 MHz  
WDW EM  
SSB 0  
LB 0 Hz  
GB 0  
PC 1.00

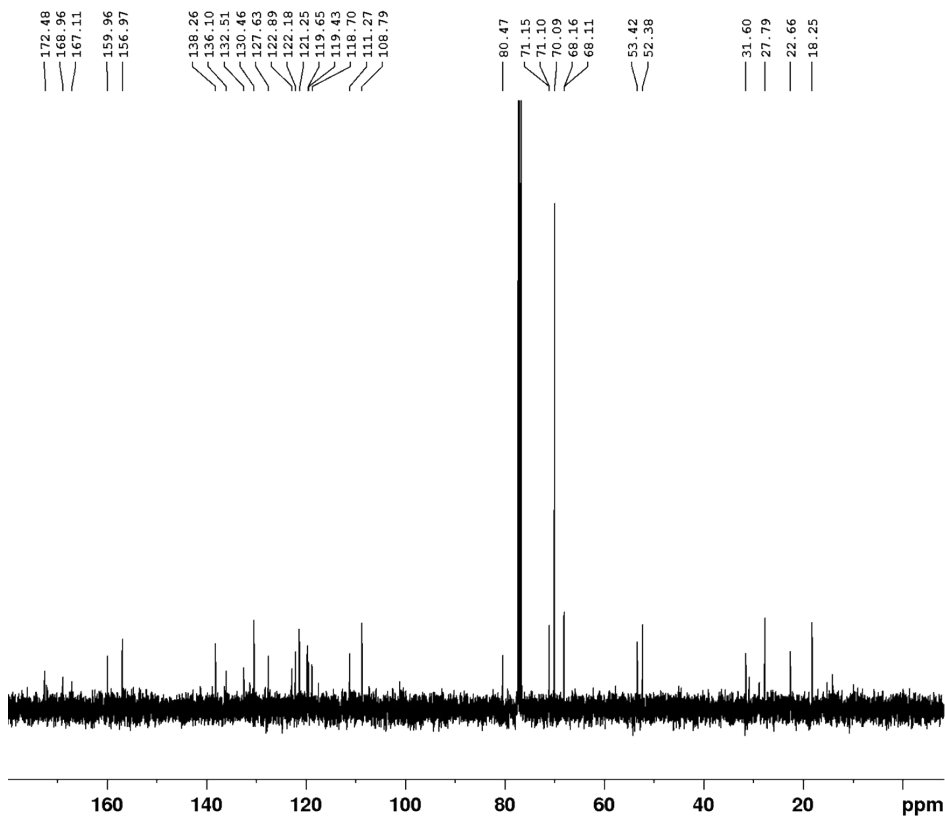

Current Data Parameters

NAME FL08902  
EXPNO 12  
PROCNO 1

F2 - Acquisition Parameters

Date\_ 20220419  
Time 16.45 h  
INSTRUM Avance Neo 400  
PROBHD Z175272\_0007 (  
PULPROG zgdc30  
TD 32768  
SOLVENT CDCl3  
NS 128  
DS 0  
SWH 23809.523 Hz  
FIDRES 1.453219 Hz  
AQ 0.6881280 sec  
RG 22.6  
DW 21.000 usec  
DE 6.50 usec  
TE 298.0 K  
D1 1.50000000 sec  
D11 0.03000000 sec  
TDO 1  
SFO1 100.6238383 MHz  
NUC1 13C  
PO 3.33 usec  
P1 10.00 usec  
PLW1 58.46900177 W  
SFO2 400.1316008 MHz  
NUC2 1H  
CPDPRG2 waltz16  
PCPD2 90.00 usec  
PLW2 20.07200050 W  
PLW12 0.24781001 W

F2 - Processing parameters

SI 65536  
SF 100.6127690 MHz  
WDW EM  
SSB 0  
LB 1.00 Hz  
GB 0  
PC 0.50

# Compound 15d

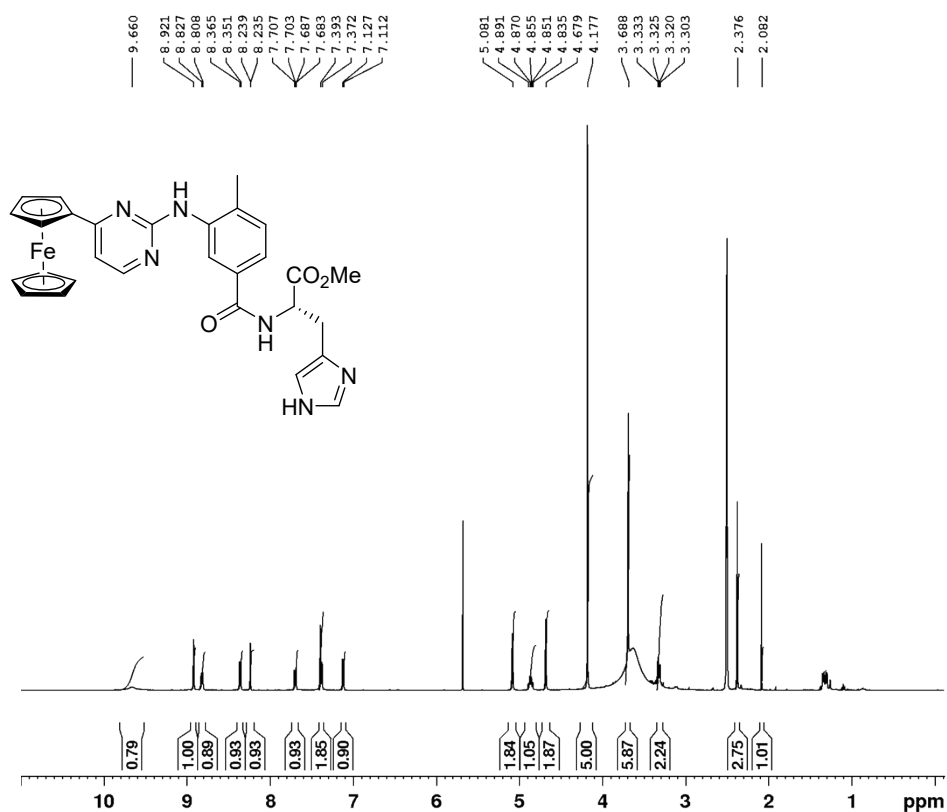

Current Data Parameters  
 NAME FL09204  
 EXPNO 24  
 PROCNO 1

F2 - Acquisition Parameters  
 Date\_ 20220513  
 Time 14.58 h  
 INSTRUM Avance Neo 400  
 PROBHD Z175272\_0007 (  
 PULPROG zg30  
 TD 32768  
 SOLVENT DMSO  
 NS 32  
 DS 0  
 SWH 6578.947 Hz  
 FIDRES 0.401547 Hz  
 AQ 2.4903679 sec  
 RG 101  
 DW 76.000 usec  
 DE 7.79 usec  
 TE 353.0 K  
 D1 2.0000000 sec  
 TD0 1  
 SFO1 400.1330415 MHz  
 NUC1 1H  
 P0 3.33 usec  
 P1 10.00 usec  
 PLW1 20.07200050 W

F2 - Processing parameters  
 SI 65536  
 SF 400.1300037 MHz  
 WDW EM  
 SSB 0  
 LB 0 Hz  
 GB 0  
 PC 1.00

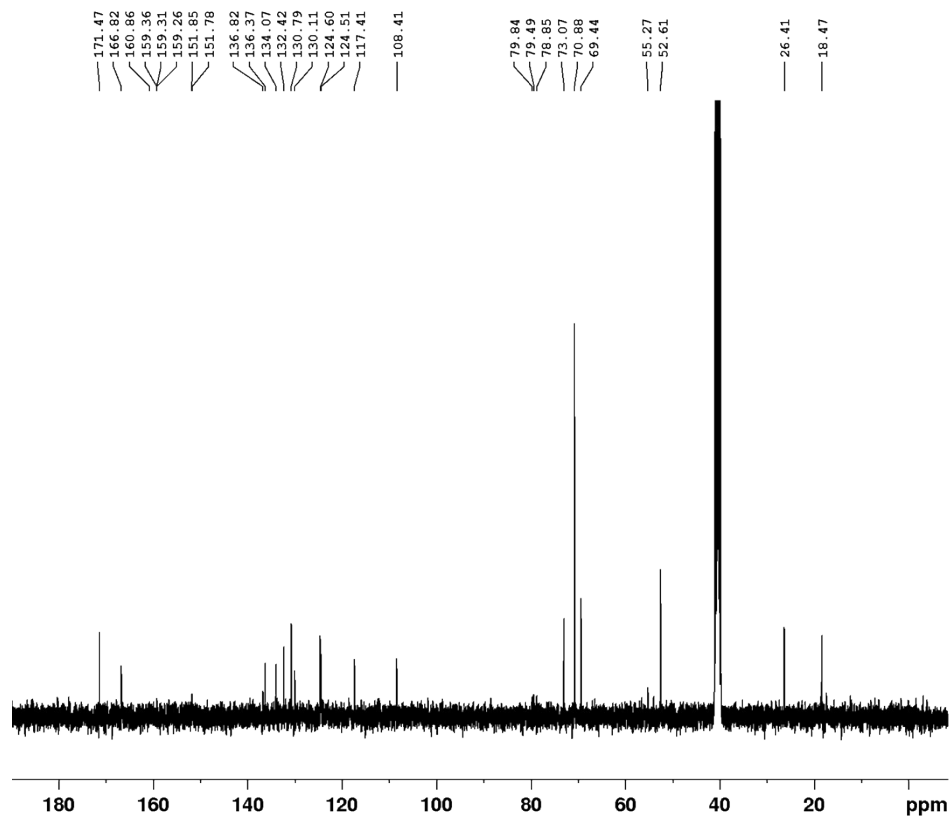

Current Data Parameters  
 NAME FL09204  
 EXPNO 25  
 PROCNO 1

F2 - Acquisition Parameters  
 Date\_ 20220513  
 Time 15.44 h  
 INSTRUM Avance Neo 400  
 PROBHD Z175272\_0007 (  
 PULPROG zgdc30  
 TD 32768  
 SOLVENT DMSO  
 NS 512  
 DS 0  
 SWH 23809.523 Hz  
 FIDRES 1.453218 Hz  
 AQ 0.6881280 sec  
 RG 45.2  
 DW 21.000 usec  
 DE 6.50 usec  
 TE 353.0 K  
 D1 1.5000000 sec  
 D11 0.03000000 sec  
 TD0 1  
 SFO1 100.6238383 MHz  
 NUC1 13C  
 P0 3.33 usec  
 P1 10.00 usec  
 PLW1 58.46900177 W  
 SFO2 400.1316008 MHz  
 NUC2 1H  
 CPDPRG[2] waltz16  
 FCPD2 90.00 usec  
 PLW2 20.07200050 W  
 PLW12 0.24781001 W

F2 - Processing parameters  
 SI 65536  
 SF 100.6127690 MHz  
 WDW EM  
 SSB 0  
 LB 1.00 Hz  
 GB 0  
 PC 0.50

# Compound 15e

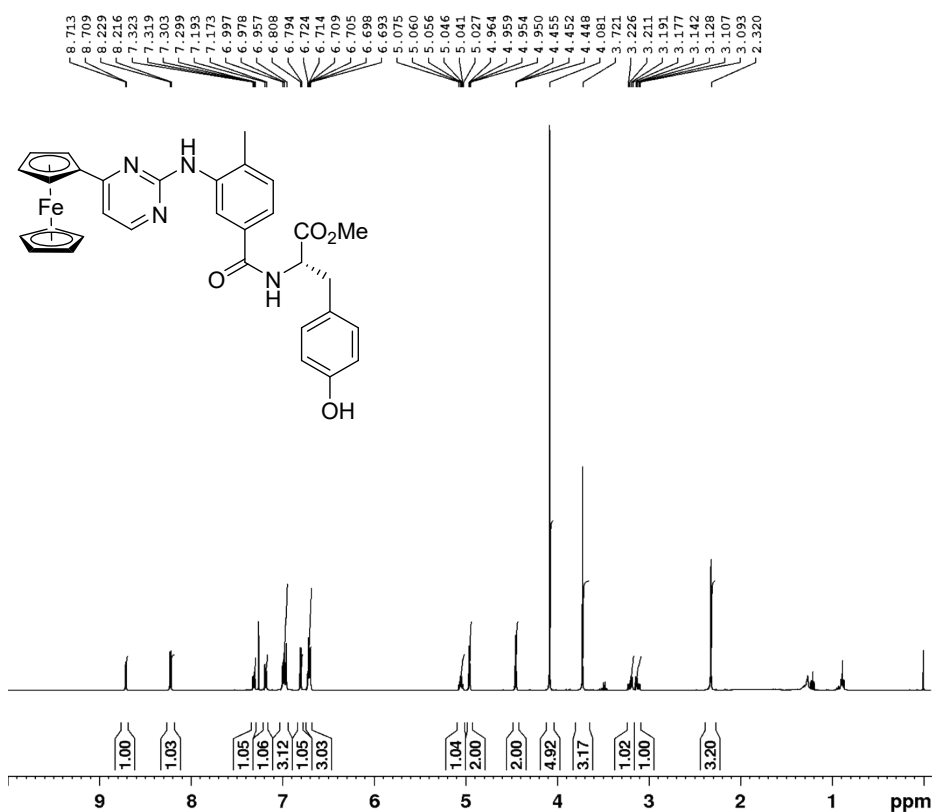

Current Data Parameters  
 NAME FL09302  
 EXPNO 11  
 PROCNO 1

F2 - Acquisition Parameters  
 Date\_ 20220510  
 Time 18.33 h  
 INSTRUM Avance Neo 400  
 PROBHD Z175272\_0007 (  
 PULPROG zg30  
 TD 32768  
 SOLVENT CDCl3  
 NS 32  
 DS 0  
 SWH 6578.947 Hz  
 FIDRES 0.401547 Hz  
 AQ 2.4903679 sec  
 RG 101  
 DW 76.000 usec  
 DE 7.79 usec  
 TE 298.0 K  
 D1 2.0000000 sec  
 TDO 1  
 SFO1 400.1330415 MHz  
 NUC1 1H  
 P0 3.33 usec  
 P1 10.00 usec  
 PLW1 20.07200050 W

F2 - Processing parameters  
 SI 65536  
 SF 400.1300098 MHz  
 WDW EM  
 SSB 0  
 LB 0 Hz  
 GB 0  
 PC 1.00

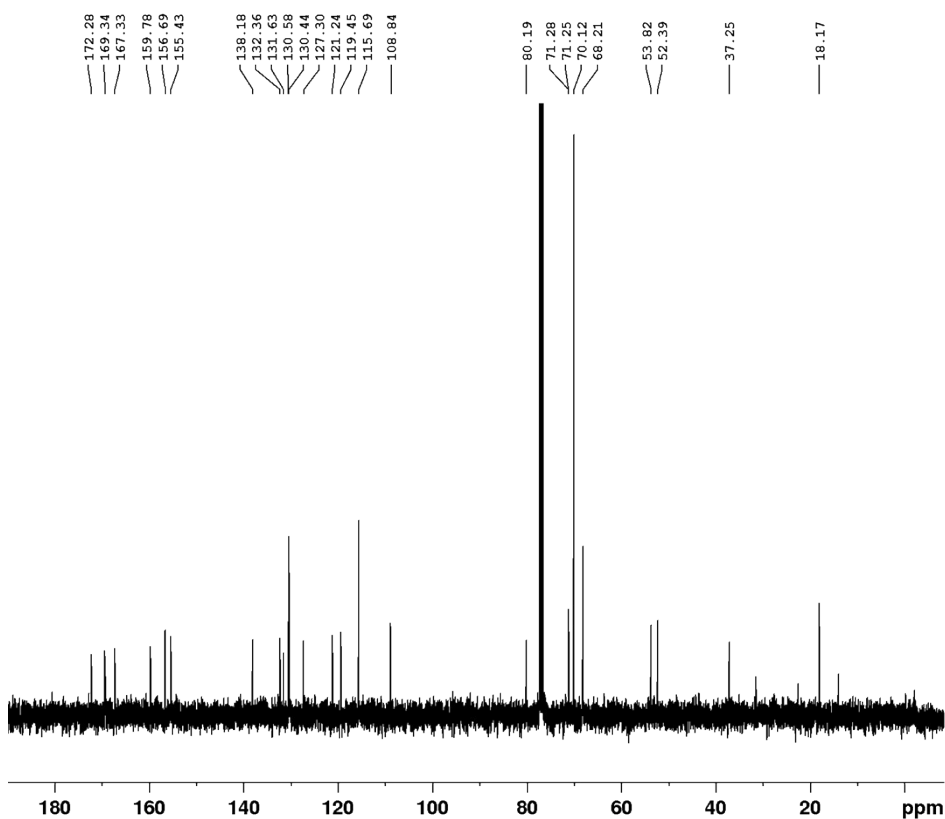

Current Data Parameters  
 NAME FL09302  
 EXPNO 12  
 PROCNO 1

F2 - Acquisition Parameters  
 Date\_ 20220510  
 Time 18.38 h  
 INSTRUM Avance Neo 400  
 PROBHD Z175272\_0007 (  
 PULPROG zgdc30  
 TD 32768  
 SOLVENT CDCl3  
 NS 128  
 DS 0  
 SWH 23809.523 Hz  
 FIDRES 1.453219 Hz  
 AQ 0.6881280 sec  
 RG 22.6  
 DW 21.000 usec  
 DE 6.50 usec  
 TE 298.0 K  
 D1 1.5000000 sec  
 D11 0.0300000 sec  
 TDO 1  
 SFO1 100.6238383 MHz  
 NUC1 13C  
 P0 3.33 usec  
 P1 10.00 usec  
 PLW1 58.46900177 W  
 SFO2 400.1316008 MHz  
 NUC2 1H  
 CPDPRG2 waltz16  
 FCPD2 90.00 usec  
 PLW2 20.07200050 W  
 PLW12 0.24781001 W

F2 - Processing parameters  
 SI 65536  
 SF 100.6127690 MHz  
 WDW EM  
 SSB 0  
 LB 1.00 Hz  
 GB 0  
 PC 1.40



**$^1\text{H}$  NMR monitoring of 15a stability in DMSO- $d_6$  (80%) / PBS in  $\text{D}_2\text{O}$  (20%)**

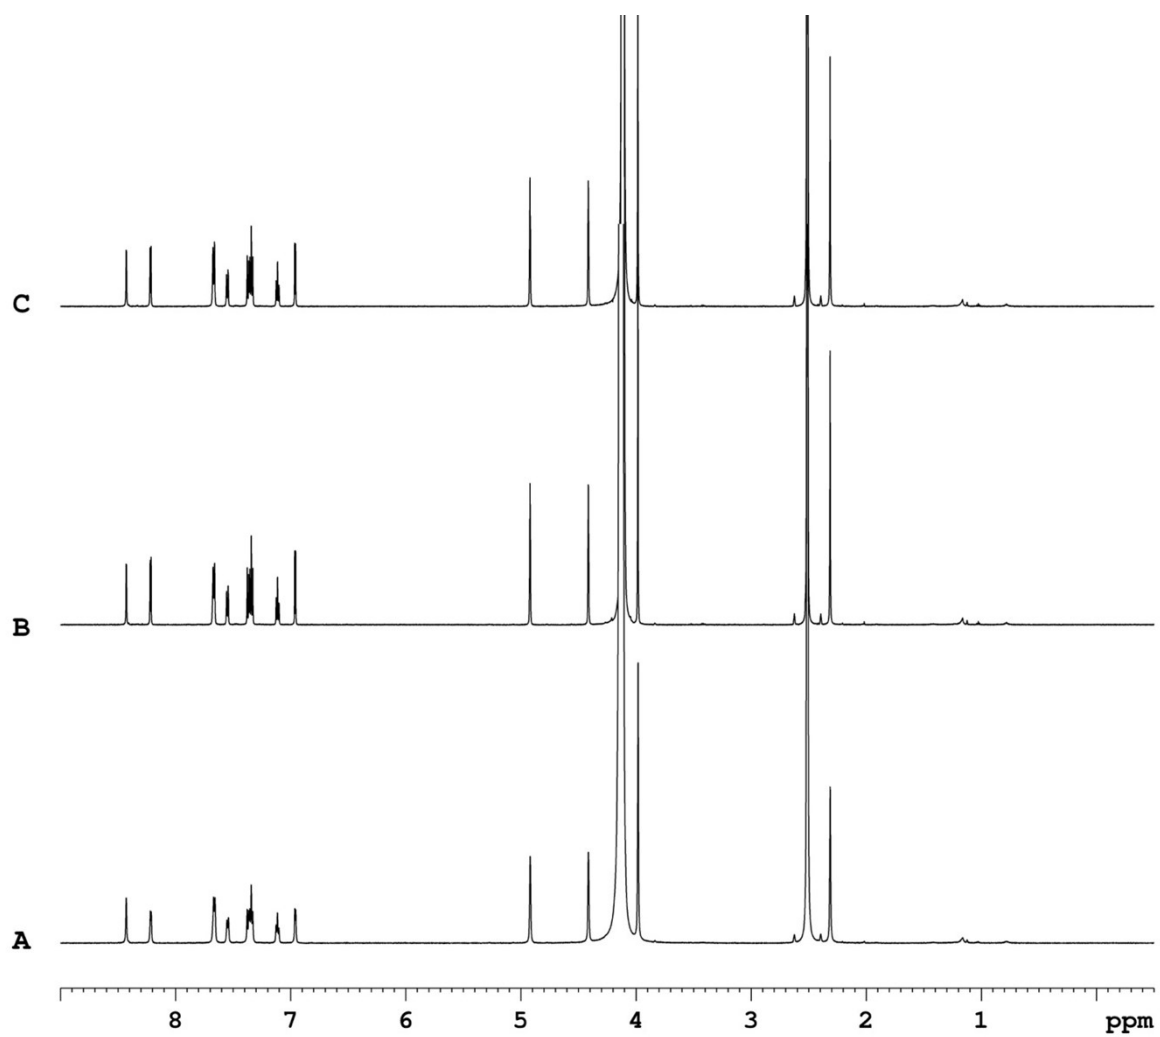

Spectra recorded at: **A**  $t = 0$  min; **B**  $t = 24$  h; **C**  $t = 4$  d.
